# Supplementary material
Source: PubMed Central journal article supplement (PMC2596381)

# Supplementary Figure 1

**a**

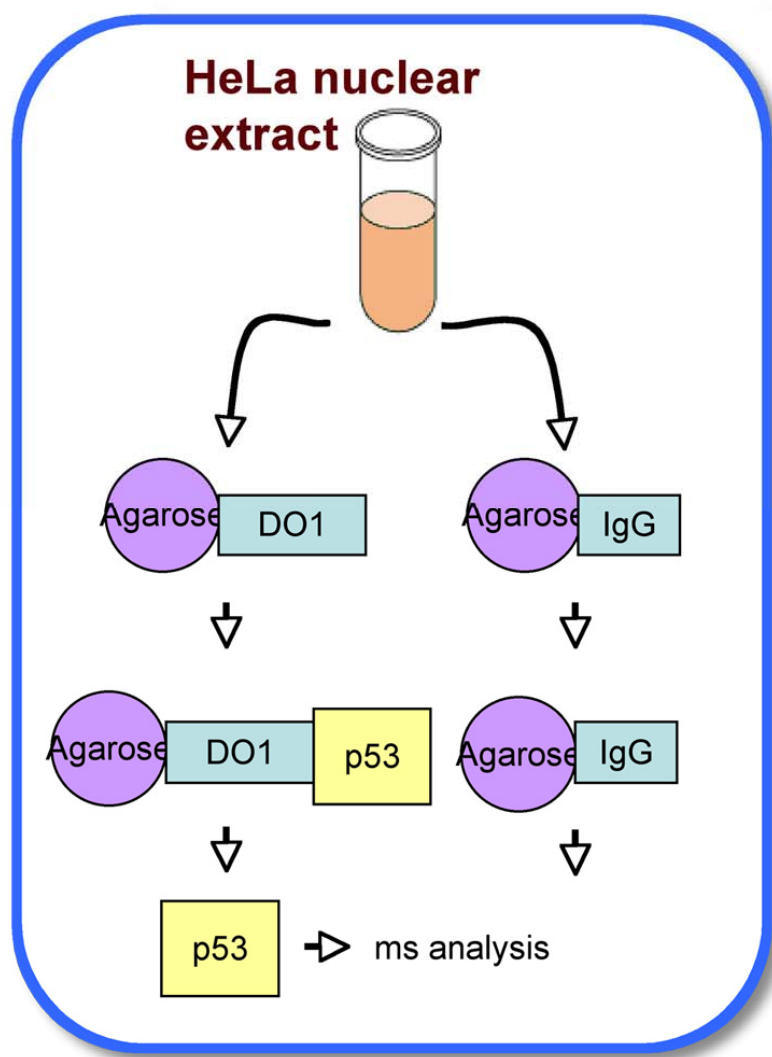

**b**

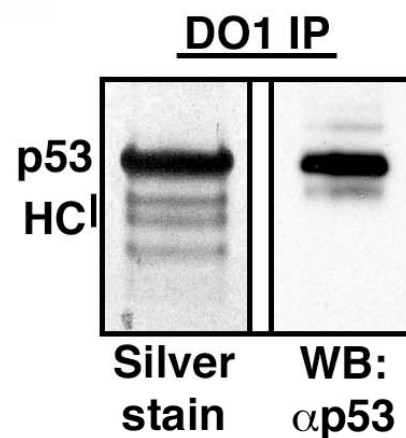

**c**

| peptide sequence | lysine | unmodified, kDa | mass observed, | mass shift, Da | Conclusion |
|------------------|--------|-----------------|----------------|----------------|------------|
| AHSSHLK          | K370   | 779.4158        | 807.4458       | 28.03          | dimethyl   |
| LMFK             | K386   | 538.3057        | 552.3157       | 14.01          | monomethyl |
| LMFK             | K386   | 538.3057        | 566.3357       | 28.03          | dimethyl   |

## Supplementary Figure 2

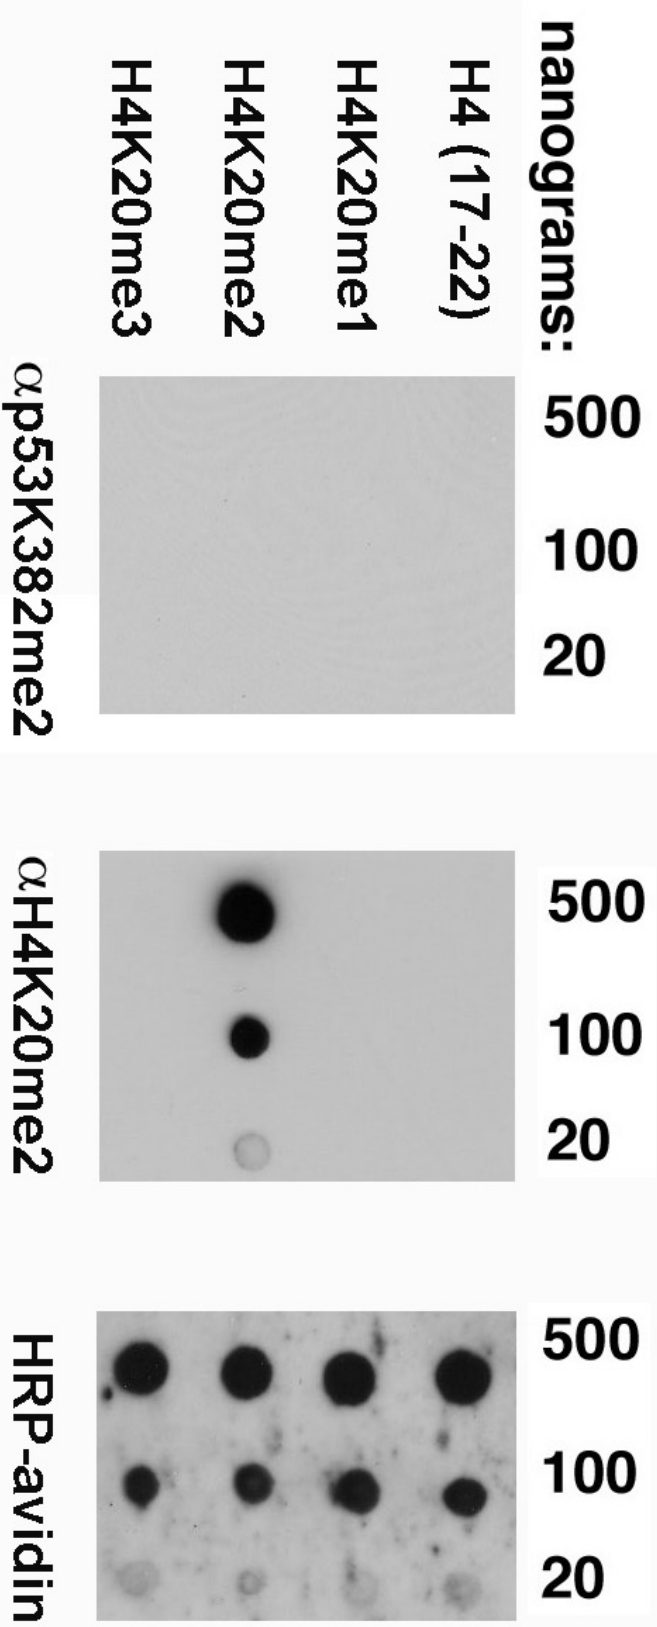

# Supplementary Figure 3

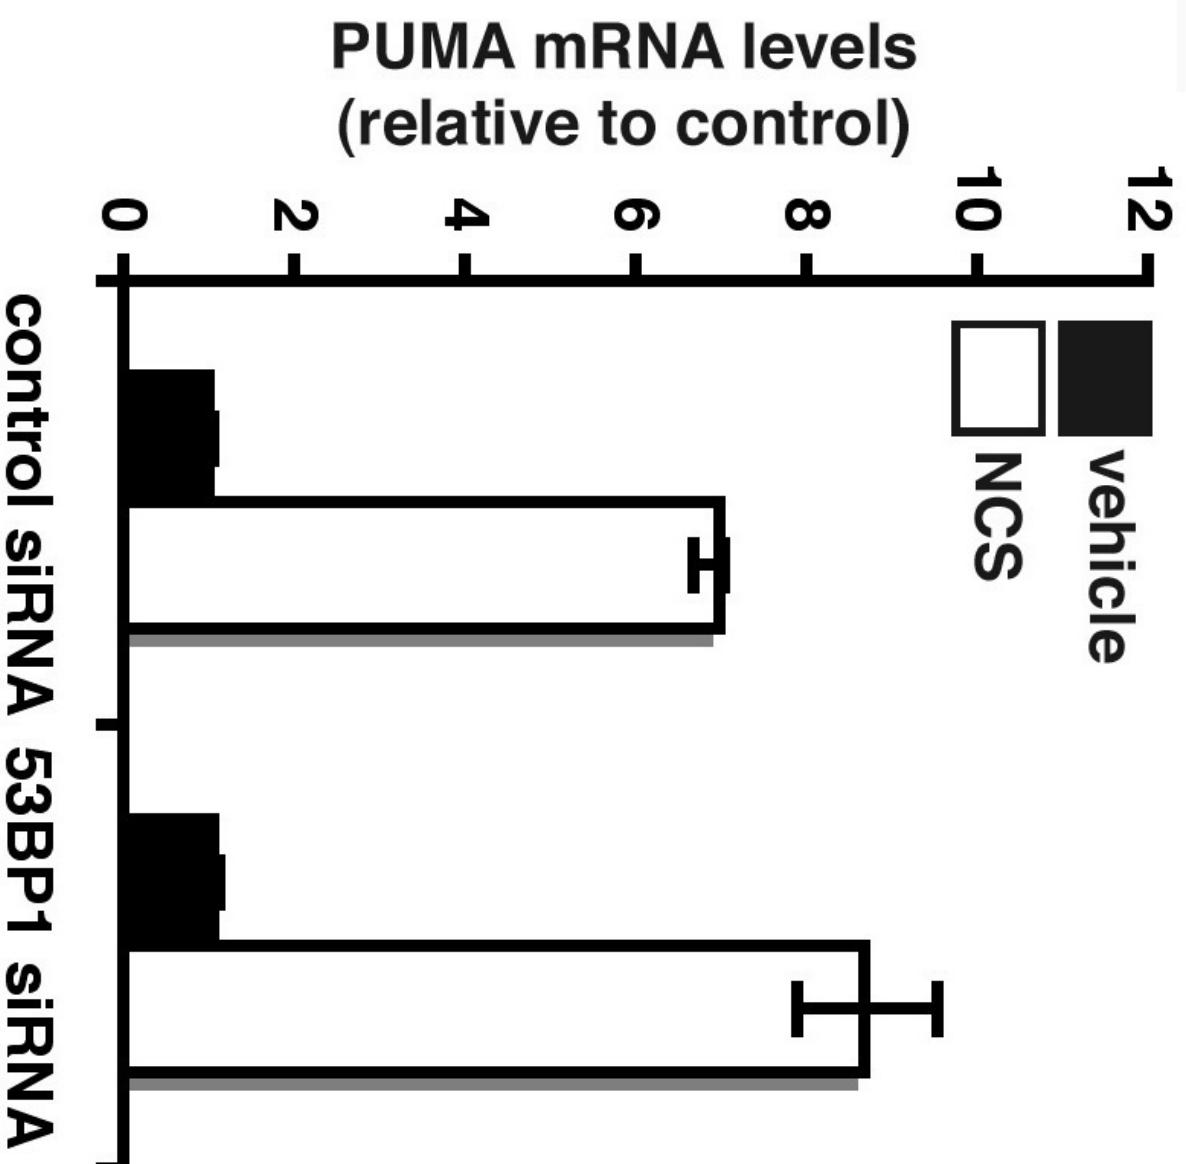

# Supplementary Figure 4

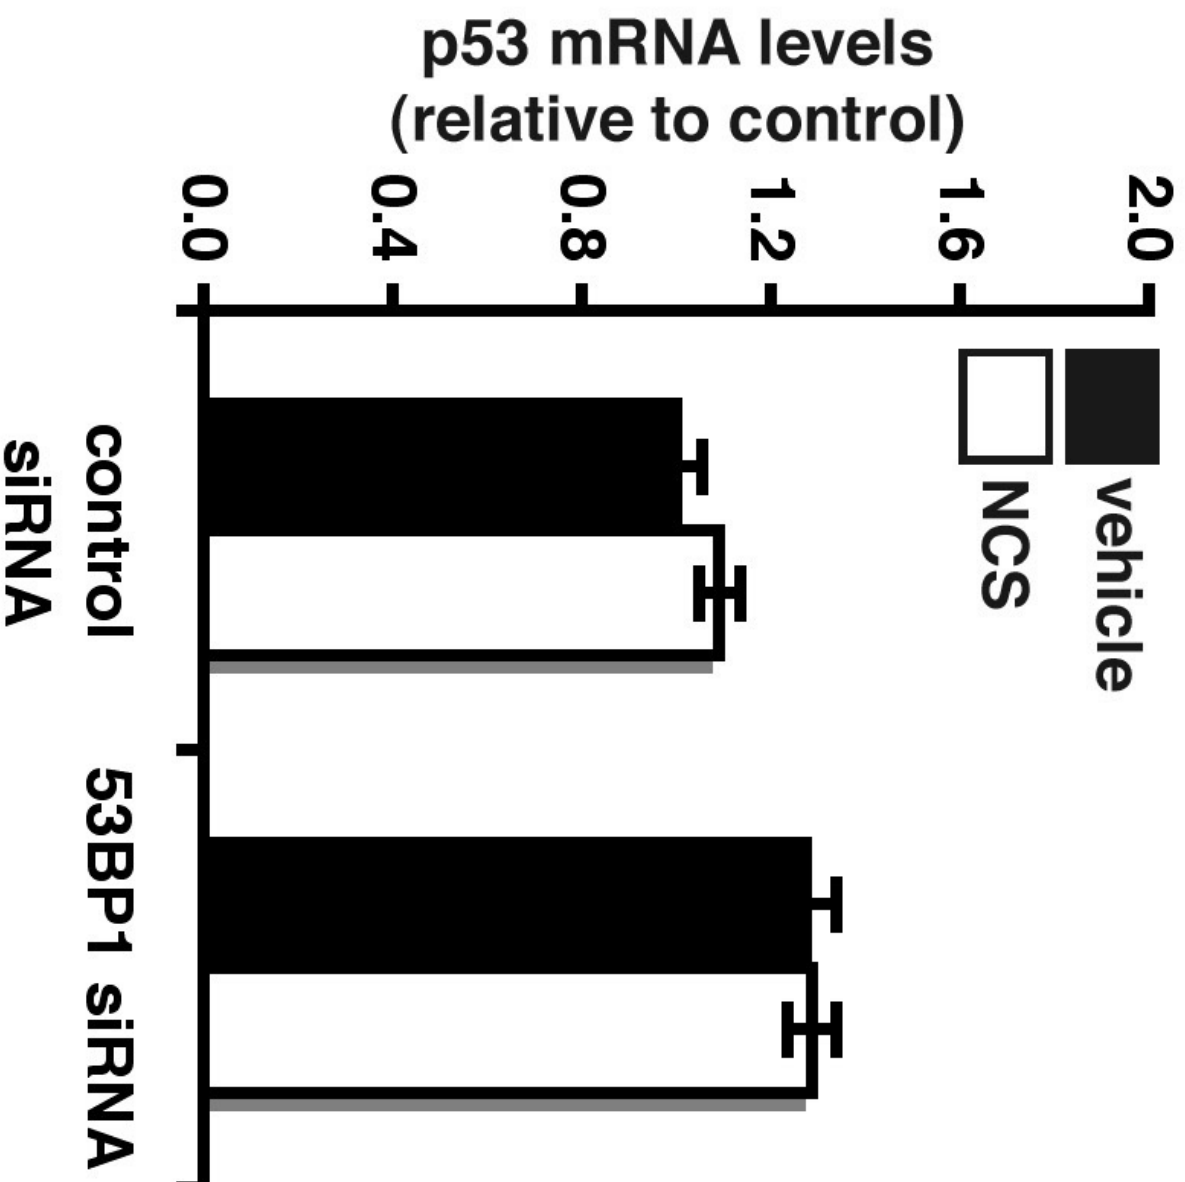

Supplementary Figure 5

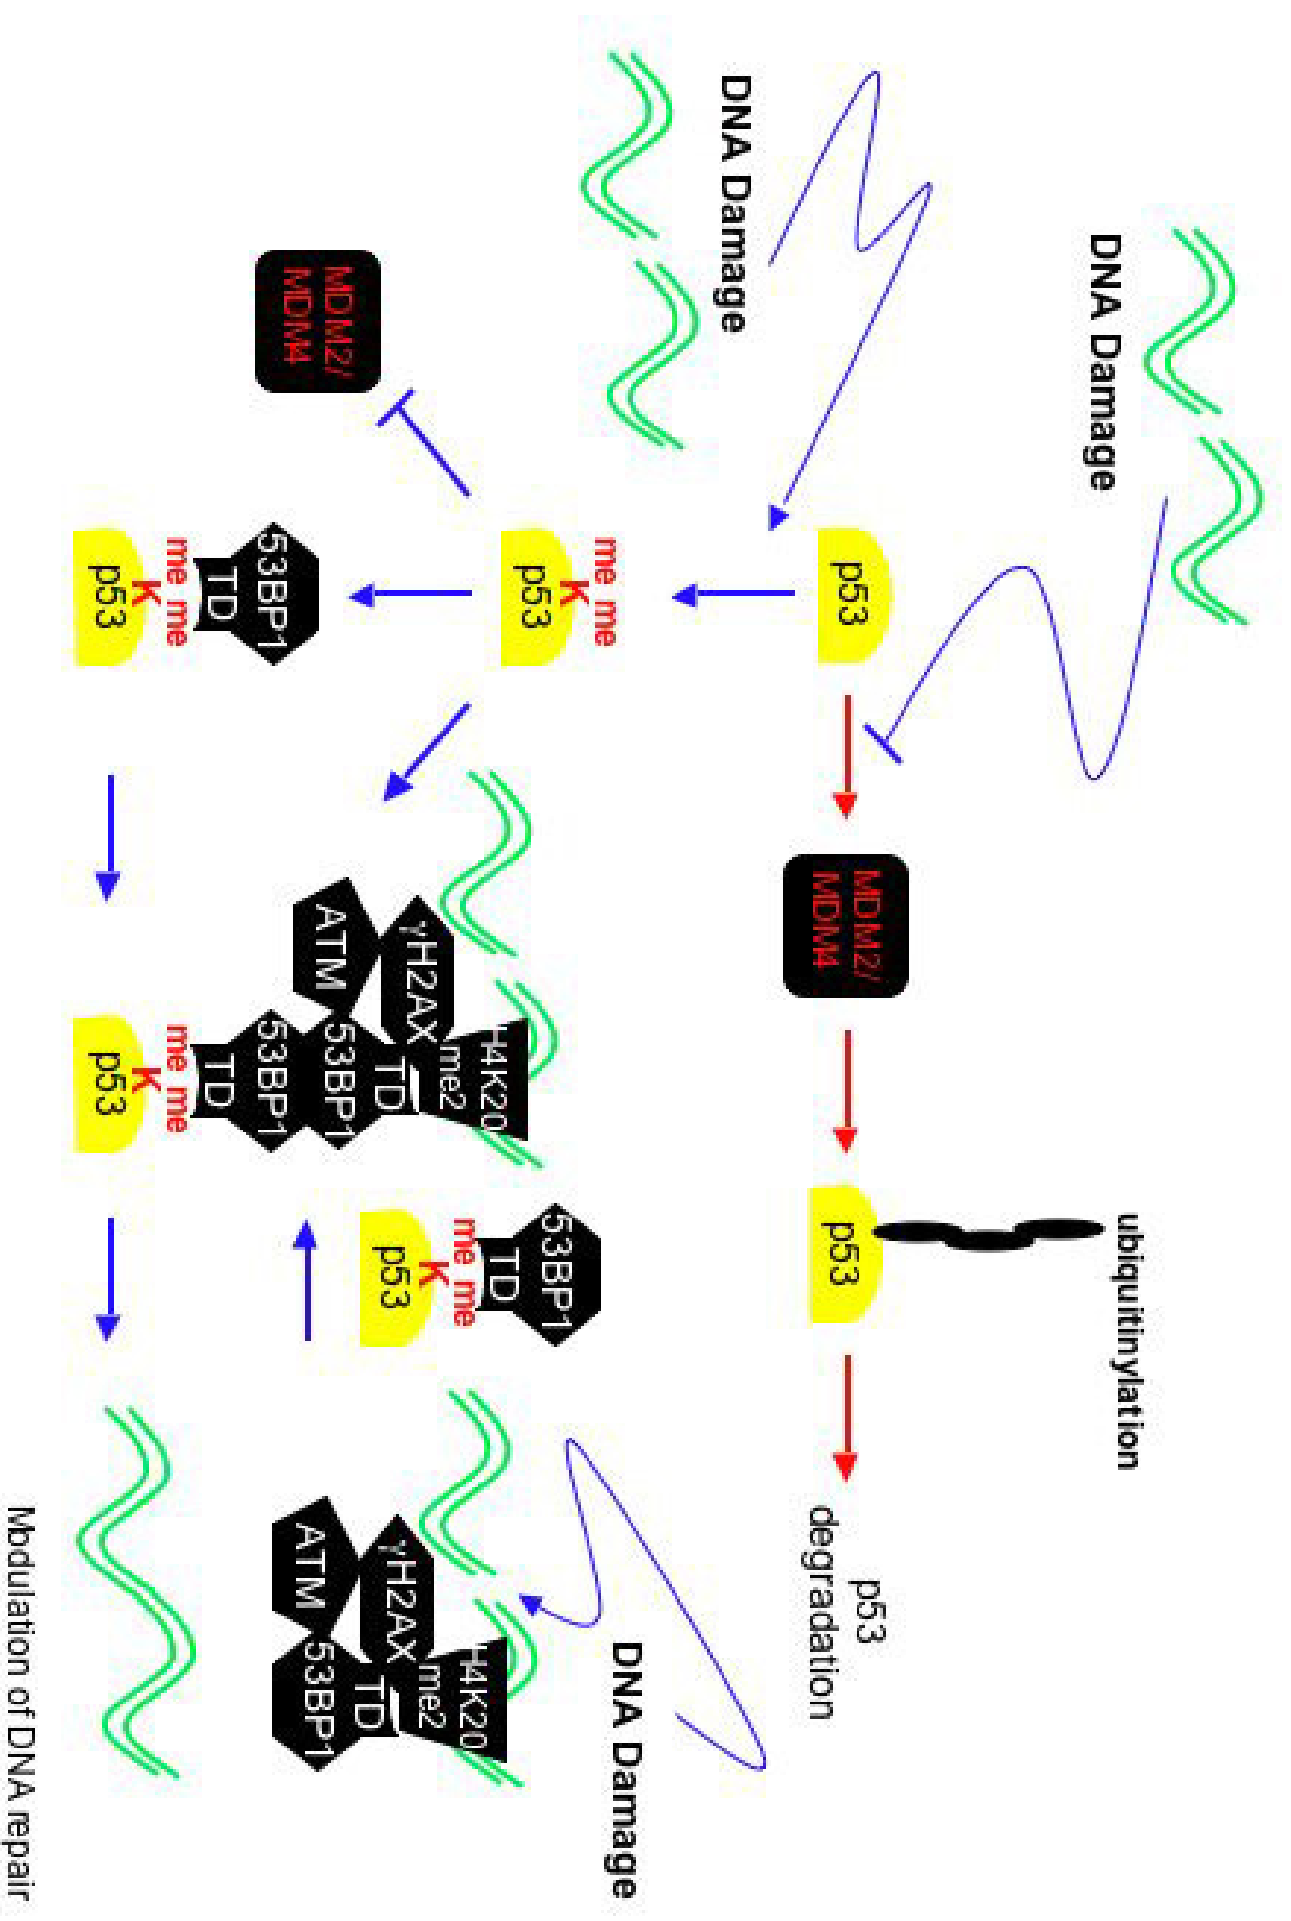

Supplement: M806020200_2.pdf [file M806020200_2.pdf]
